# Supplementary material for: Oxoiron(iv)-mediated Baeyer–Villiger oxidation of cyclohexanones generated by dioxygen with co-oxidation of aldehydes
Source: Royal Society of Chemistry journal article supplement (doi:10.1039/c5nj02093j), 2015-01-01
Supplement: c5nj02093j1.pdf [file c5nj02093j1.pdf]

Supplementary material for the paper

RSC NJC (08. 27. 2015)

Oxoiron(IV)-mediated Baeyer-Villiger oxidation of cyclohexanones generated by dioxygen  
with co-oxidation of aldehydes.

Dóra Lakk-Bogáth,<sup>a</sup> Gábor Speier,<sup>a</sup> and József Kaizer\*<sup>a</sup>

<sup>a</sup>*Department of Chemistry, University of Pannonia, H-8200 Veszprém, Hungary. Fax: +36 88 624 469; Tel: +36 88 624 720; E-mail: kaizer@almos.vein.hu.*

Materials

Analytical and physical measurements

Determination of products

Catalytic oxidations

Stoichiometric oxidations

I. Iron-catalyzed Baeyer-Villiger oxidation of cyclohexanones with O<sub>2</sub> in the presence of aldehydes

II. Fe<sup>IV</sup>=O formation with O<sub>2</sub> in the presence of aldehydes

III. Fe<sup>IV</sup>=O mediated Baeyer-Villiger oxidation

## Materials

[Fe<sup>II</sup>(N<sub>4</sub>Py)(CH<sub>3</sub>CN)](ClO<sub>4</sub>)<sub>2</sub> was prepared according to the literature. All other chemicals were commercial products and they were used without further purification.

## Analytical and physical measurements

UV-vis spectra were recorded on an Agilent 8453 diode-array spectrophotometer using quartz cells. GC analyses were performed on an Agilent 7820A gas chromatograph equipped with a flame ionization detector and a 30 m HP-5 column. GC-MS analyses were carried out on Shimadzu QP2010SE equipped with a secondary electron multiplier detector with conversion dynode and a 30 m HP-5MS column.

## Determination of products

All reactions were carried out in a 20 mL Schlenk tube equipped with a condenser. Cyclohexanone ( $1.00 \times 10^{-2}$  M),  $[\text{Fe}^{\text{II}}(\text{N}_4\text{Py})(\text{CH}_3\text{CN})](\text{ClO}_4)_2$  ( $1.00 \times 10^{-5}$  M), acetonitrile (5 mL) and the initiator isobutyraldehyde or benzaldehyde derivatives ( $1.50 \times 10^{-1}$  M) were added and then the mixture was stirred at 25°C or 60°C under oxygen atmosphere for 2-24 hours. The products were identified by GC (Agilent 7820A) and GC-MS (Shimadzu QP2010SE) and the yields were calculated based on the amount of cyclohexanone consumed in the reactions.

## Catalytic oxidations

$[\text{Fe}^{\text{II}}(\text{N}_4\text{Py})(\text{CH}_3\text{CN})](\text{ClO}_4)_2$  complex ( $2.00 \times 10^{-3}$  M) was dissolved in acetonitrile (1.5 mL) then the benzaldehyde was added to the solution and the progress of the reaction was monitored with UV-vis spectrophotometer (Agilent 8453) at 693 nm ( $\epsilon = 400 \text{ M}^{-1} \text{ cm}^{-1}$ ).

## Stoichiometric oxidations

$[\text{Fe}^{\text{II}}(\text{N}_4\text{Py})(\text{CH}_3\text{CN})](\text{ClO}_4)_2$  complex ( $2.00 \times 10^{-3}$  M) was dissolved in acetonitrile (1.5 mL), then iodosobenzene ( $4.00 \times 10^{-3}$  M) was added to the solution. The mixture was stirred for one hour then excess iodosobenzene was removed by filtration. Cyclohexanone ( $1.00 \times 10^{-1}$  M) was added to the solution and the reaction was monitored with UV-vis spectrophotometer (Agilent 8453) at 693 nm ( $\epsilon = 400 \text{ M}^{-1} \text{ cm}^{-1}$ ).

## I. Iron-catalyzed Baeyer-Villiger oxidation of cyclohexanones with $\text{O}_2$ in the presence of aldehydes

**Fig. S1.** GC-MS chromatogram of the reaction of cyclohexanone, benzaldehyde and **1** in MeCN at 60°C under oxygen atmosphere.  $[\mathbf{1}]_0 = 1.00 \times 10^{-5}$  M,  $[\text{cyclohexanone}]_0 = 1.00 \times 10^{-2}$  M,  $[\text{benzaldehyde}]_0 = 1.50 \times 10^{-1}$  M.

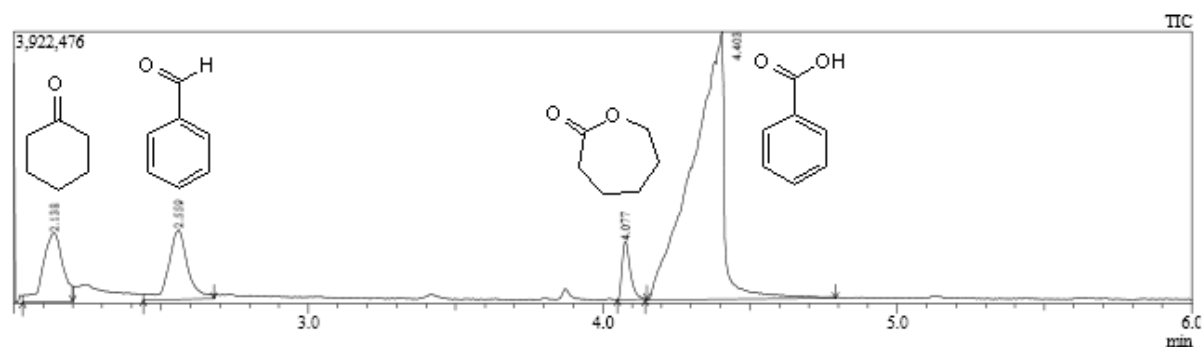

$\epsilon$ -caprolactone:  $m/z$  (relative intensity) 114 ( $\text{M}^+$ , 12.6); 84 (24.1); 70 (15.3); 56 (39.6); 55 (100); 42 (99.8); 41 (49.6); 39 (23.5).

**Fig. S2.** GC-MS chromatogram of the reaction of cyclohexanone, benzaldehyde and **1** in MeCN at 25°C under  $^{18}\text{O}$  atmosphere.  $[\mathbf{1}]_0 = 1.00 \times 10^{-5} \text{ M}$ ,  $[\text{cyclohexanone}]_0 = 1.00 \times 10^{-2} \text{ M}$ ,  $[\text{benzaldehyde}]_0 = 1.50 \times 10^{-1} \text{ M}$ .

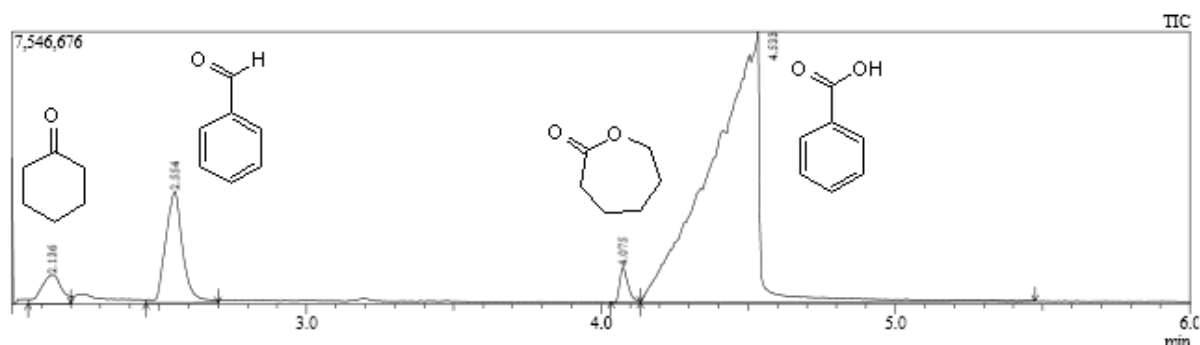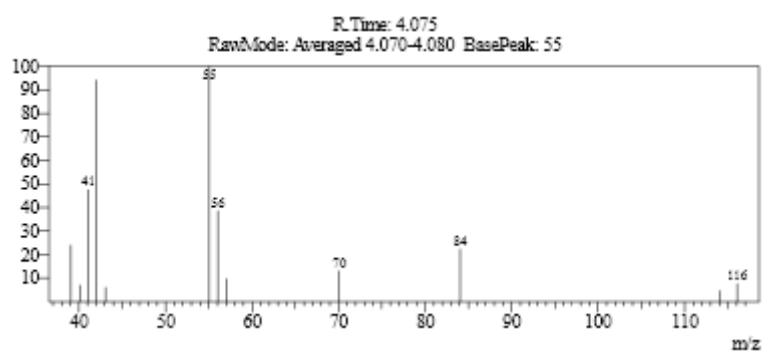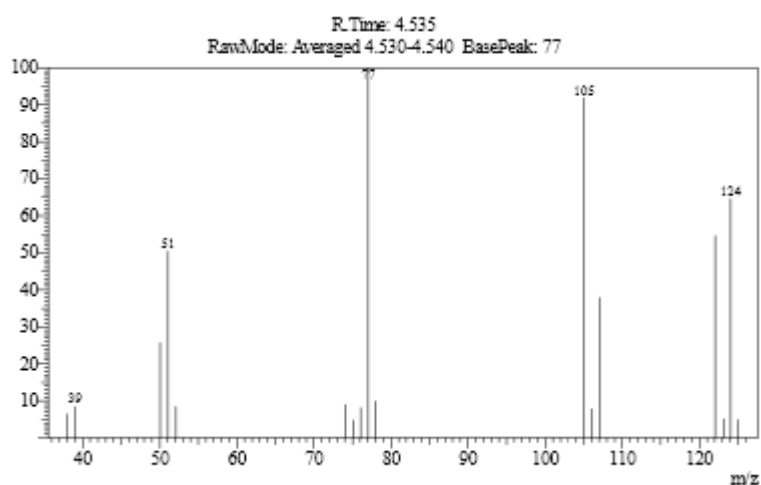

cyclohexanone: m/z (relative intensity) 98 ( $\text{M}^+$ , 39.4); 83 (9.2); 70 (22.8); 69 (30.9); 57 (12); 56 (10.2); 55 (100); 43 (11.7); 42 (77.9); 41 (36); 39 (27.4).

benzaldehyde: m/z (relative intensity) 107 (13.6); 106 ( $\text{M}^+$ , 86.7); 105 (80.3); 94 (7.7); 78 (17.2); 77 (100); 74 (8.7); 66 (5.3); 52 (12.4); 51 (51.1); 50 (27.5); 39 (9.9).

$\epsilon$ -caprolactone: m/z (relative intensity) 116 (7.7); 114 ( $\text{M}^+$ , 4.8); 84 (22.4); 70 (13.1); 57 (9.7); 56 (38.7); 55 (100); 42 (94.3); 41 (47.7); 39 (24).

benzoic acid: m/z (relative intensity) 124 (64.6); 122 ( $\text{M}^+$ , 54.7); 107 (37.9); 105 (91.9); 78 (10); 77 (100); 51 (50.5); 50 (25.7).

**Fig. S3.** GC-MS chromatogram of the reaction of 2-methyl-cyclohexanone, benzaldehyde and **1** in MeCN at 60°C under oxygen atmosphere.  $[\mathbf{1}]_0 = 1.00 \times 10^{-5}$  M,  $[2\text{-methyl-cyclohexanone}]_0 = 1.00 \times 10^{-2}$  M,  $[\text{benzaldehyde}]_0 = 1.50 \times 10^{-1}$  M.

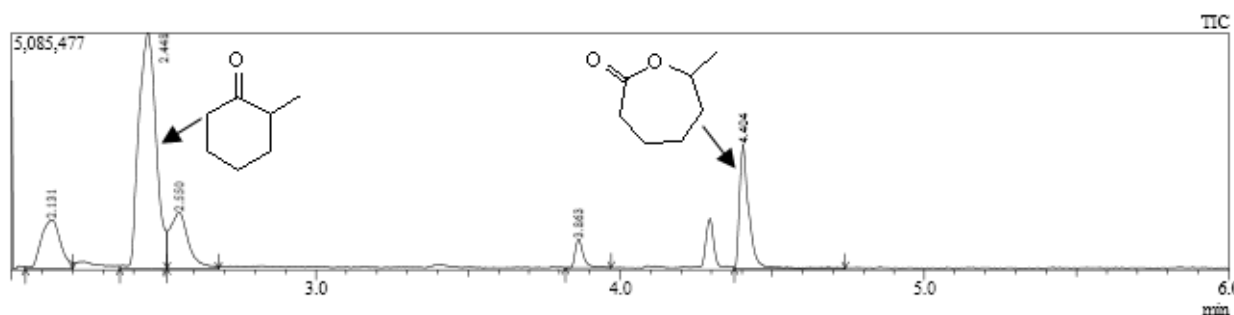

6-methyl-ε-caprolactone: m/z (relative intensity) 128 ( $M^+$ , 10.1); 98 (16.5); 96 (54.4); 83 (26.3); 82 (16.2); 70 (25.2); 69 (28.3); 56 (100); 55 (54.2); 54 (34.7); 43 (16.3); 42 (29.5); 41 (56.2); 39 (24.8).

**Fig. S4.** GC-MS chromatogram of the reaction of 3-methyl-cyclohexanone, benzaldehyde and **1** in MeCN at 60°C under oxygen atmosphere.  $[\mathbf{1}]_0 = 1.00 \times 10^{-5}$  M,  $[3\text{-methyl-cyclohexanone}]_0 = 1.00 \times 10^{-2}$  M,  $[\text{benzaldehyde}]_0 = 1.50 \times 10^{-1}$  M.

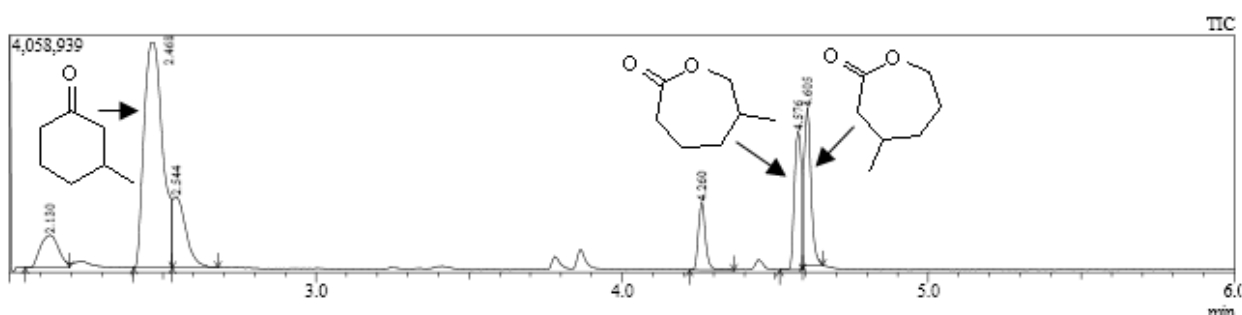

5-methyl-ε-caprolactone: m/z (relative intensity) 128 ( $M^+$ , 7); 100 (13); 98 (31.9); 72 (16.5); 70 (18); 69 (100); 57 (11.3); 56 (61.7); 55 (72.6); 43 (23.4); 42 (90); 41 (59.3); 39 (27.7).

3-methyl-ε-caprolactone: m/z (relative intensity) 128 ( $M^+$ , 12.1); 98 (100); 83 (18.6); 80 (73.9); 70 (11.1); 69 (25.2); 56 (47.5); 55 (52.2); 42 (24.7); 41 (59.6); 39 (25.8).

**Fig. S5.** GC-MS chromatogram of the reaction of 4-methyl-cyclohexanone, benzaldehyde and **1** in MeCN at 60°C under oxygen atmosphere.  $[1]_0 = 1.00 \times 10^{-5}$  M,  $[4\text{-methyl-cyclohexanone}]_0 = 1.00 \times 10^{-2}$  M,  $[\text{benzaldehyde}]_0 = 1.50 \times 10^{-1}$  M.

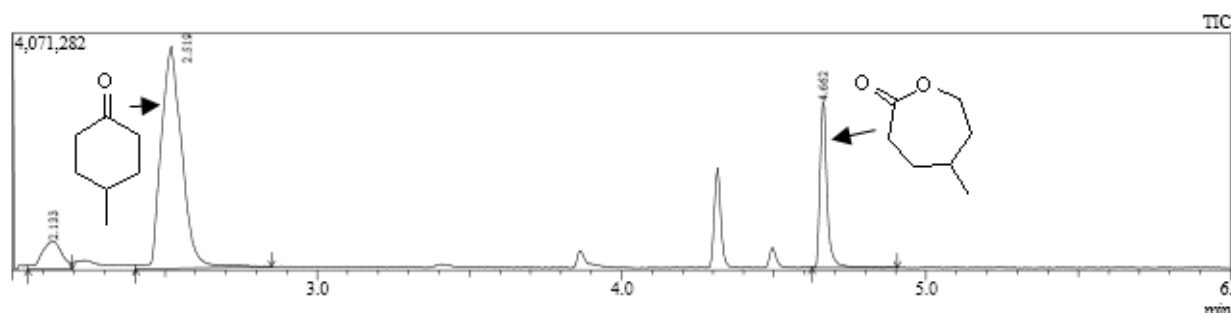

4-methyl- $\epsilon$ -caprolactone: m/z (relative intensity) 128 ( $M^+$ , 8.1); 98 (13.2); 70 (9.5); 69 (51.3); 57 (6); 56 (100); 55 (51.4); 43 (11.3); 42 (20.7); 41 (41.4); 39 (14.4).

**Fig. S6.** GC-MS chromatogram of the reaction of 4-tert-butyl-cyclohexanone, benzaldehyde and **1** in MeCN at 60°C under oxygen atmosphere.  $[1]_0 = 1.00 \times 10^{-5}$  M,  $[4\text{-tert-butyl-cyclohexanone}]_0 = 1.00 \times 10^{-2}$  M,  $[\text{benzaldehyde}]_0 = 1.50 \times 10^{-1}$  M.

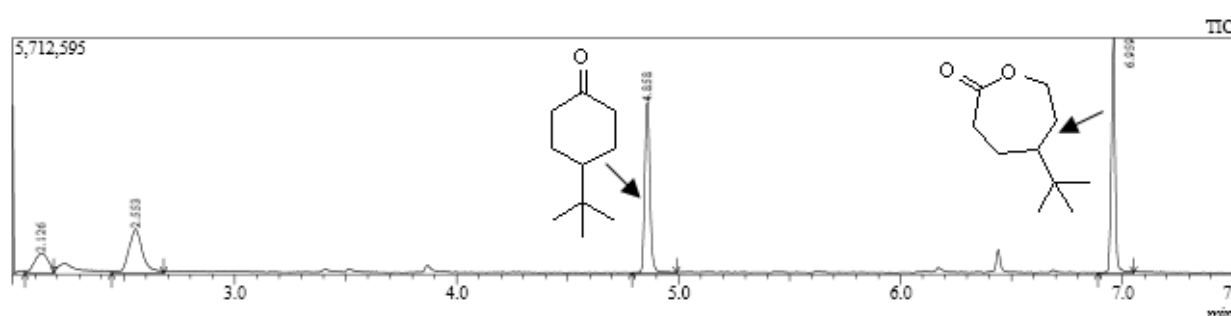

4-tert-butyl- $\epsilon$ -caprolactone: m/z (relative intensity) 170 ( $M^+$ , 4.1); 114 (69.2); 86 (79.6); 83 (12.7); 69 (12.5); 68 (16.8); 57 (100); 56 (12.1); 55 (75.8); 54 (12.8); 43 (9.5); 42 (6.8); 41 (46.8); 39 (14.0).

**Table S1.** Calculated yields, TON and TOF values for the reaction of **1** with different benzaldehyde and cyclohexanone derivatives in MeCN under oxygen atmosphere.

| $N_0$ | t (h) | T (K) | substrate                  | $[\text{Fe}]_0$ ( $10^{-3}$ M) | $[\text{S}]_0$ (M) | co-reductant         | $[\text{co-reductant}]_0$ | yield (%) | TON | TOF (1/h) |
|-------|-------|-------|----------------------------|--------------------------------|--------------------|----------------------|---------------------------|-----------|-----|-----------|
| 1     | 17    | 298   | cyclohexanone <sup>A</sup> | 0.01                           | 0.01               | benzaldehyde         | 0.15                      | 21.5      | 215 | 12.65     |
| 2     | 5     | 333   | cyclohexanone              | -                              | 0.01               | benzaldehyde         | 0.15                      | 9.8       | -   | -         |
| 2     | 5     | 333   | cyclohexanone              | 0.01                           | 0.01               | benzaldehyde         | 0.15                      | 33.6      | 336 | 67.20     |
| 3     | 5     | 333   | cyclohexanone              | 0.01                           | 0.01               | isobutyraldehyde     | 0.15                      | 6.2       | 62  | 12.40     |
| 4     | 15    | 333   | cyclohexanone              | 0.01                           | 0.01               | benzaldehyde         | 0.15                      | 73.0      | 730 | 48.67     |
| 5     | 15    | 333   | cyclohexanone              | 0.01                           | 0.01               | isobutyraldehyde     | 0.15                      | 16.4      | 164 | 10.93     |
| 6     | 15    | 333   | cyclohexanone              | 0.01                           | 0.01               | 4-methylbenzaldehyde | 0.15                      | 79.5      | 795 | 53.00     |
| 7     | 15    | 333   | cyclohexanone              | 0.01                           | 0.01               | 4-chlorobenzaldehyde | 0.15                      | 54.7      | 547 | 36.47     |
| 8     | 15    | 333   | cyclohexanone              | 0.01                           | 0.01               | 4-cyanobenzaldehyde  | 0.15                      | 36.4      | 364 | 24.27     |
| 9     | 15    | 333   | cyclohexanone              | 0.01                           | 0.01               | 4-nitrobenzaldehyde  | 0.15                      | 29.4      | 294 | 19.60     |
| 10    | 15    | 333   | cyclohexanone              | -                              | 0.01               | benzaldehyde         | 0.15                      | 28.3      | -   | -         |
| 11    | 15    | 333   | cyclohexanone              | -                              | 0.01               | 4-methylbenzaldehyde | 0.15                      | 32.9      | -   | -         |

|    |    |     |                                     |      |      |                                    |      |      |      |       |
|----|----|-----|-------------------------------------|------|------|------------------------------------|------|------|------|-------|
| 12 | 15 | 333 | cyclohexanone                       | -    | 0.01 | 4-chlorobenzaldehyde               | 0.15 | 18.2 | -    | -     |
| 13 | 15 | 333 | cyclohexanone                       | -    | 0.01 | 4-cyanobenzaldehyde                | 0.15 | 10.3 | -    | -     |
| 14 | 15 | 333 | cyclohexanone                       | -    | 0.01 | 4-nitrobenzaldehyde                | 0.15 | 8.9  | -    | -     |
| 15 | 15 | 333 | 2-methyl-cyclohexanone              | -    | 0.01 | benzaldehyde                       | 0.15 | 25.2 | -    | -     |
| 16 | 15 | 333 | 3-methyl-cyclohexanone <sup>C</sup> | -    | 0.01 | benzaldehyde                       | 0.15 | 2.2  | -    | -     |
| 17 | 15 | 333 | 4-methyl-cyclohexanone              | -    | 0.01 | benzaldehyde                       | 0.15 | 18.5 | -    | -     |
| 18 | 15 | 333 | 4-tert-butyl-cyclohexanone          | -    | 0.01 | benzaldehyde                       | 0.15 | 3.8  | -    | -     |
| 19 | 24 | 298 | cyclohexanone <sup>B</sup>          | 0.01 | 0.01 | benzaldehyde                       | 0.15 | 33.1 | 331  | 13.79 |
| 20 | 15 | 333 | 2-methyl-cyclohexanone <sup>C</sup> | 0.01 | 0.01 | benzaldehyde                       | 0.15 | 62.5 | 625  | 41.67 |
| 21 | 15 | 333 | 3-methyl-cyclohexanone <sup>D</sup> | 0.01 | 0.01 | benzaldehyde                       | 0.15 | 15.5 | 155  | 10.33 |
| 22 | 15 | 333 | 4-methyl-cyclohexanone              | 0.01 | 0.01 | benzaldehyde                       | 0.15 | 53.0 | 530  | 35.33 |
| 23 | 15 | 333 | 4-tert-butyl-cyclohexanone          | 0.01 | 0.01 | benzaldehyde                       | 0.15 | 18.0 | 180  | 12.00 |
| 24 | 15 | 333 | cyclohexanone                       | -    | 0.01 | <i>m</i> -chloroperoxybenzoic acid | 0.15 | 92.6 | -    | -     |
| 25 | 15 | 333 | cyclohexanone                       | 0.01 | 0.01 | <i>m</i> -chloroperoxybenzoic acid | 0.15 | 100  | 1000 | 66.67 |
| 26 | 5  | 333 | cyclohexanone                       | -    | 0.01 | <i>m</i> -chloroperoxybenzoic acid | 0.15 | 16.8 | -    | -     |
| 27 | 5  | 333 | cyclohexanone                       | 0.01 | 0.01 | <i>m</i> -chloroperoxybenzoic acid | 0.15 | 59.1 | 591  | 118.2 |
| 28 | 5  | 323 | cyclohexanone                       | 0.01 | 0.01 | <i>m</i> -chloroperoxybenzoic acid | 0.15 | 41.6 | 416  | 83.2  |
| 29 | 5  | 343 | cyclohexanone                       | 0.01 | 0.01 | <i>m</i> -chloroperoxybenzoic acid | 0.15 | 73.9 | 739  | 147.8 |
| 30 | 5  | 323 | cyclohexanone                       | 0.01 | 0.01 | benzaldehyde                       | 0.15 | 21.9 | 219  | 43.8  |
| 31 | 5  | 343 | cyclohexanone                       | 0.01 | 0.01 | benzaldehyde                       | 0.15 | 46.8 | 468  | 93.6  |

<sup>A</sup> under air

<sup>B</sup> under <sup>18</sup>O atmosphere

<sup>C</sup> only 6-methyl- $\epsilon$ -caprolactone was formed (T. Kawabata, Y. Ohishi, S. Itsuku, N. Fujisaki, T. Shishido, K. Takaki, Q. Zhang, Y. Wang and K. Takehira, *J. Mol. Cat. A.:Chemical*, 2005, **236**, 99-106)

<sup>D</sup> two products were formed in 1:1 ratio.

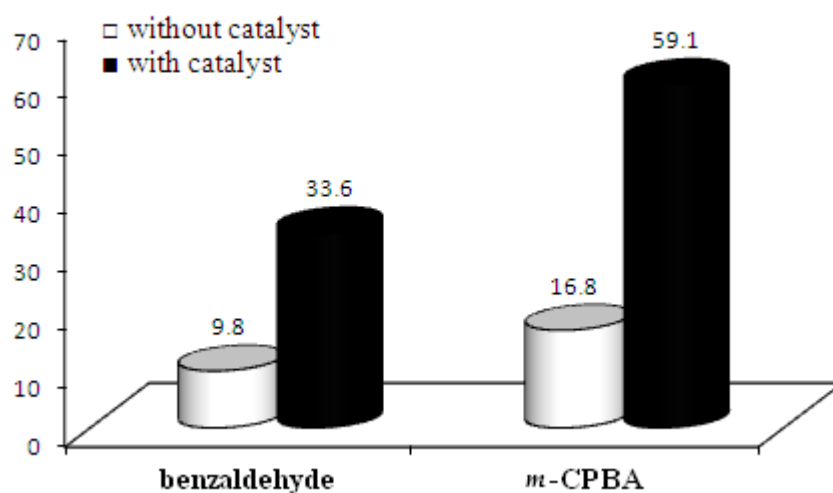

**Figure S7.** Yields without and with catalyst for the **1**-catalysed B.-V. oxidation of cyclohexanone with benzaldehyde or *m*-CPBA in MeCN at 60°C for 5 hours.  $[\mathbf{1}]_0 = 1.00 \times 10^{-5}$  M,  $[\text{cyclohexanone}]_0 = 1.00 \times 10^{-2}$  M,  $[\text{benzaldehyde}]_0 = 1.50 \times 10^{-1}$  M,  $[\text{m-CPBA}]_0 = 1.50 \times 10^{-1}$  M.

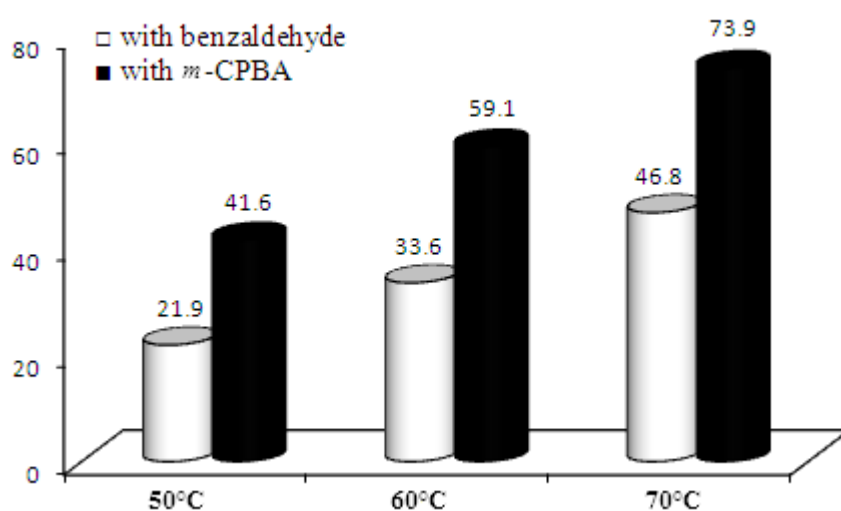

**Figure S8.** Yields with benzaldehyde (□) and with *m*-CPBA (■) for the **1**-catalysed B.-V. oxidation of cyclohexanone in MeCN at 60°C for 5 hours.  $[\mathbf{1}]_0 = 1.00 \times 10^{-5}$  M,  $[\text{cyclohexanone}]_0 = 1.00 \times 10^{-2}$  M,  $[\text{benzaldehyde}]_0 = 1.50 \times 10^{-1}$  M,  $[\text{m-CPBA}]_0 = 1.50 \times 10^{-1}$  M.

**Table S2.** Calculated yields, TON and relative reaction rate values for the reaction of **1** with different benzaldehyde derivatives and cyclohexanone in MeCN under oxygen atmosphere for 15 h and at 60°C.

| N <sub>0</sub> | t (h) | T (K) | aldehyde                    | [Fe] <sub>0</sub> (10 <sup>-3</sup> M) | [S] <sub>0</sub> (M) | [aldehyde] <sub>0</sub> | yield (%) | TON | k <sub>rel</sub> |
|----------------|-------|-------|-----------------------------|----------------------------------------|----------------------|-------------------------|-----------|-----|------------------|
| 1              | 15    | 333   | benzaldehyde                | -                                      | 0.01                 | 0.15                    | 28.3      | -   | 1                |
| 2              | 15    | 333   | benzaldehyde                | 0.01                                   | 0.01                 | 0.15                    | 73        | 730 | 1                |
| 3              | 15    | 333   | 4-methylbenzaldehyde        | -                                      | 0.01                 | 0.15                    | 32.9      | -   | 1.20             |
| 4              | 15    | 333   | 4-methylbenzaldehyde        | 0.01                                   | 0.01                 | 0.15                    | 79.5      | 795 | 1.21             |
| 5              | 15    | 333   | 4-chlorobenzaldehyde        | -                                      | 0.01                 | 0.15                    | 18.2      | -   | -0.20            |
| 6              | 15    | 333   | 4-chlorobenzaldehyde        | 0.01                                   | 0.01                 | 0.15                    | 54.7      | 547 | -0.22            |
| 7              | 15    | 333   | 4-cyanobenzaldehyde         | -                                      | 0.01                 | 0.15                    | 10.3      | -   | -0.48            |
| 8              | 15    | 333   | 4-cyanobenzaldehyde         | 0.01                                   | 0.01                 | 0.15                    | 36.4      | 364 | -0.50            |
| 9              | 15    | 333   | 4-nitrobenzaldehyde         | -                                      | 0.01                 | 0.15                    | 8.9       | -   | -0.55            |
| 10             | 15    | 333   | 4-nitrobenzaldehyde         | 0.01                                   | 0.01                 | 0.15                    | 29.4      | 294 | -0.58            |
| 11             | 15    | 333   | 4-hydroxybenzaldehyde       | -                                      | 0.01                 | 0.15                    | -         | -   | -                |
| 12             | 15    | 333   | 4-hydroxybenzaldehyde       | 0.01                                   | 0.01                 | 0.15                    | -         | -   | -                |
| 13             | 15    | 333   | 4-dimethylaminobenzaldehyde | -                                      | 0.01                 | 0.15                    | -         | -   | -                |
| 14             | 15    | 333   | 4-dimethylaminobenzaldehyde | 0.01                                   | 0.01                 | 0.15                    | -         | -   | -                |

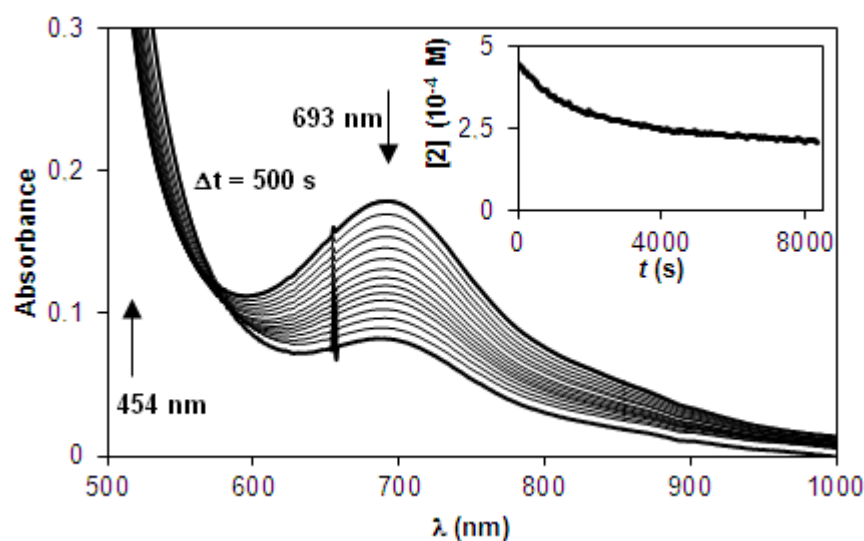

**Fig. S9.** Visible spectral change for the decay of Fe<sup>IV</sup>=O species (at 693 nm) derived from the reaction of **1**, benzaldehyde and cyclohexanone in MeCN at 25 °C. Inset: The change of Fe<sup>IV</sup>=O concentration (at 693 nm) derived from the reaction of Fe<sup>IV</sup>=O, benzaldehyde and cyclohexanone in MeCN at 25 °C. [1]<sub>0</sub> = 2.00 × 10<sup>-3</sup> M, [benzaldehyde]<sub>0</sub> = 8.00 × 10<sup>-2</sup> M, [cyclohexanone]<sub>0</sub> = 1.00 × 10<sup>-1</sup> M.



## II. Fe<sup>IV</sup>=O formation with O<sub>2</sub> in the presence of aldehydes

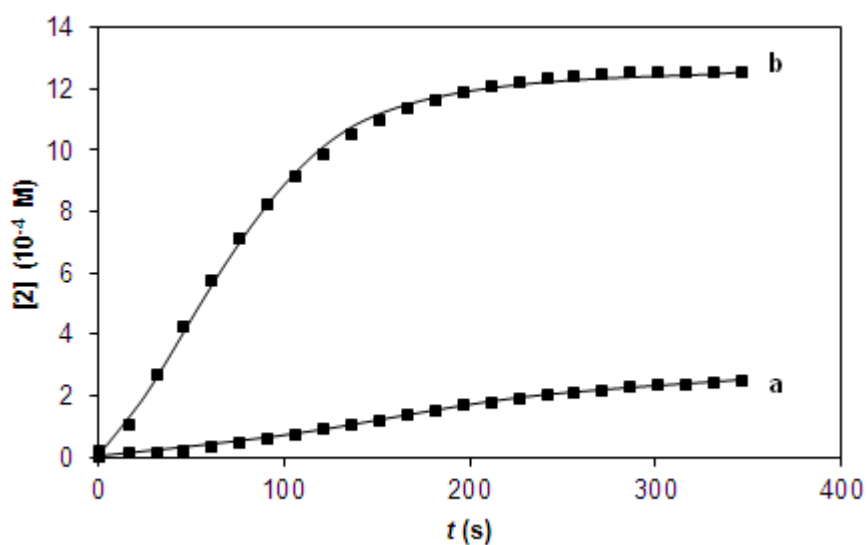

**Fig. S10.** Fe<sup>IV</sup>=O formation (at 693 nm) versus time in the reaction of **1** with benzaldehyde (a) and chloroperoxybenzoic acid (b) in MeCN at 25 °C. [1]<sub>0</sub> = 2.00 × 10<sup>-3</sup> M, [benzaldehyde]<sub>0</sub> = 1.00 × 10<sup>-2</sup> M, [*m*-chloroperoxybenzoic acid]<sub>0</sub> = 1.00 × 10<sup>-2</sup> M.

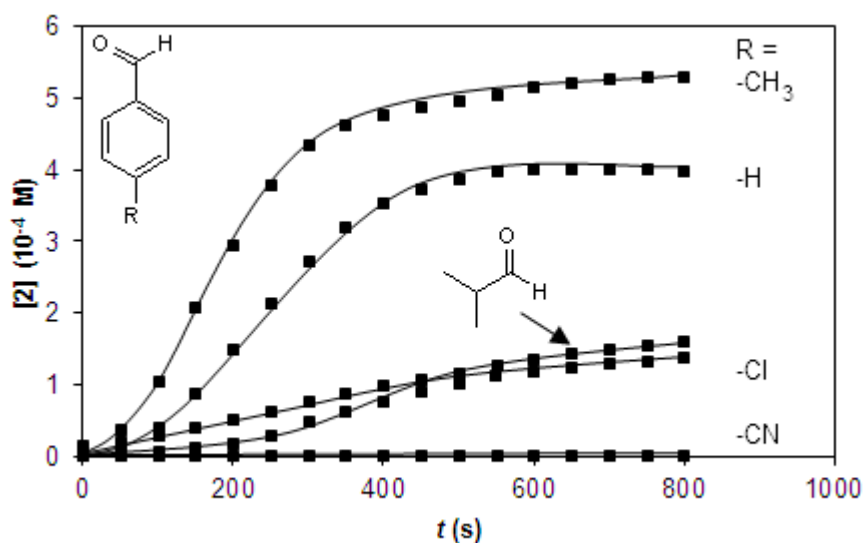

**Fig. S11.** Formation of Fe<sup>IV</sup>=O (at 693 nm) versus time in the reaction of **1** with different aldehydes in MeCN at 25 °C. [1]<sub>0</sub> = 2.00 × 10<sup>-3</sup> M, [aldehyde]<sub>0</sub> = 4.00 × 10<sup>-2</sup> M.

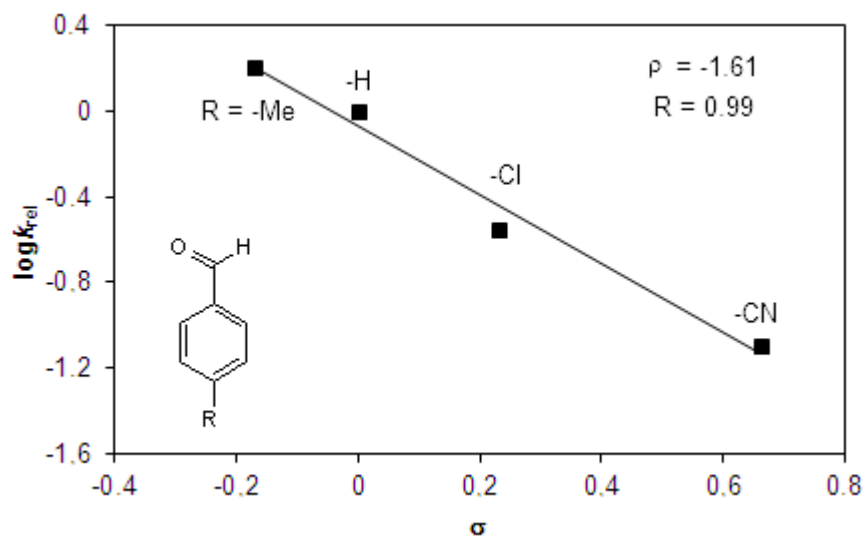

**Fig. S12.** Hammett plot of para-substituted benzaldehydes in MeCN at 25 °C.  $[1]_0 = 2.00 \times 10^{-3}$  M,  $[\text{aldehyde}]_0 = 4.00 \times 10^{-2}$  M.

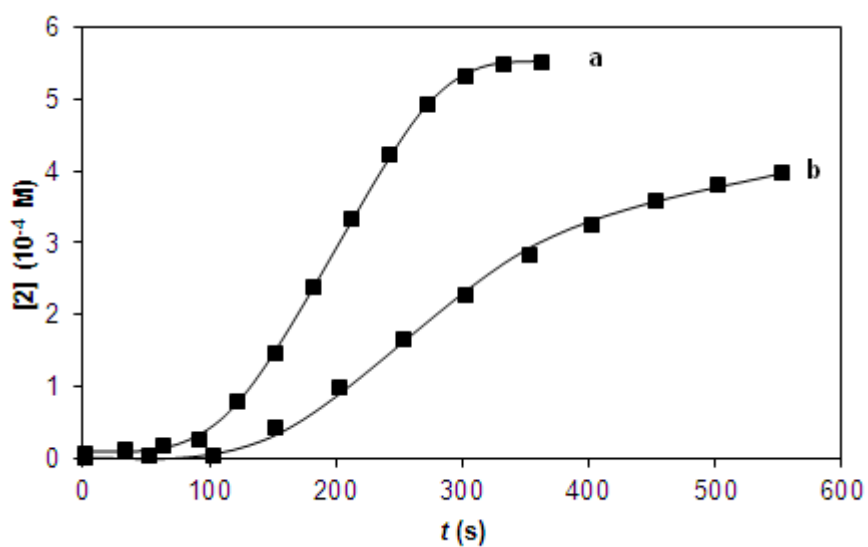

**Fig. S13.** Formation of  $\text{Fe}^{\text{IV}}=\text{O}$  (at 693 nm) versus time in the reaction of **1** with benzaldehyde under oxygen (a) and under air (b) in MeCN at 25 °C.  $[1]_0 = 1.00 \times 10^{-3}$  M,  $[\text{benzaldehyde}]_0 = 8.00 \times 10^{-2}$  M.

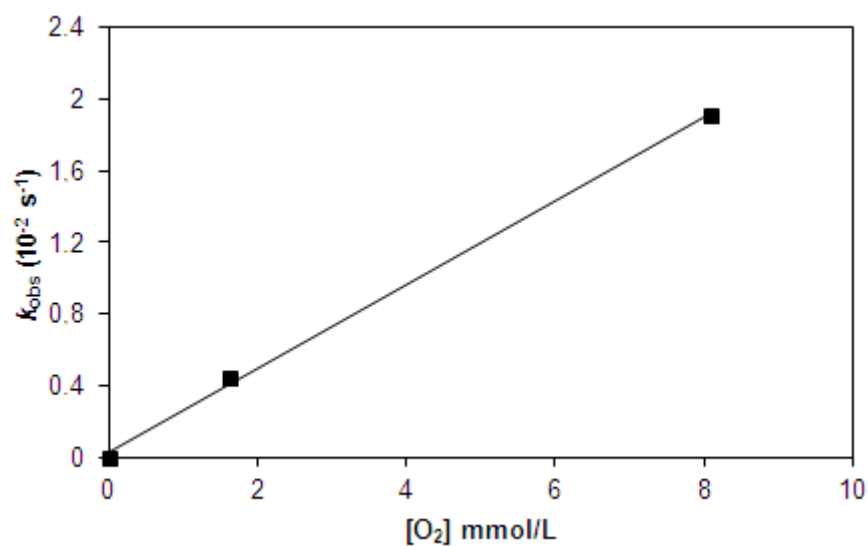

**Fig. S14.** Reaction rates versus dioxygen concentration in MeCN at 25 °C.  $[1]_0 = 1.00 \times 10^{-3}$  M,  $[\text{benzaldehyde}]_0 = 8.00 \times 10^{-2}$  M.

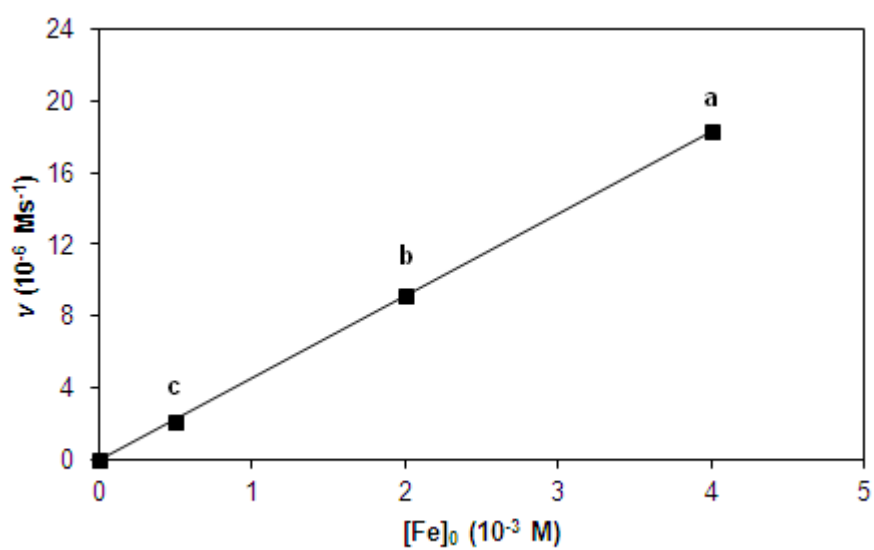

**Fig. S15.** Reaction rates versus iron concentration in MeCN at 25 °C.  $[\text{benzaldehyde}]_0 = 8.00 \times 10^{-2}$  M,  $[1]_0 = 4.00 \times 10^{-3}$  M (a);  $2.00 \times 10^{-3}$  M (b);  $5.00 \times 10^{-4}$  M (c).

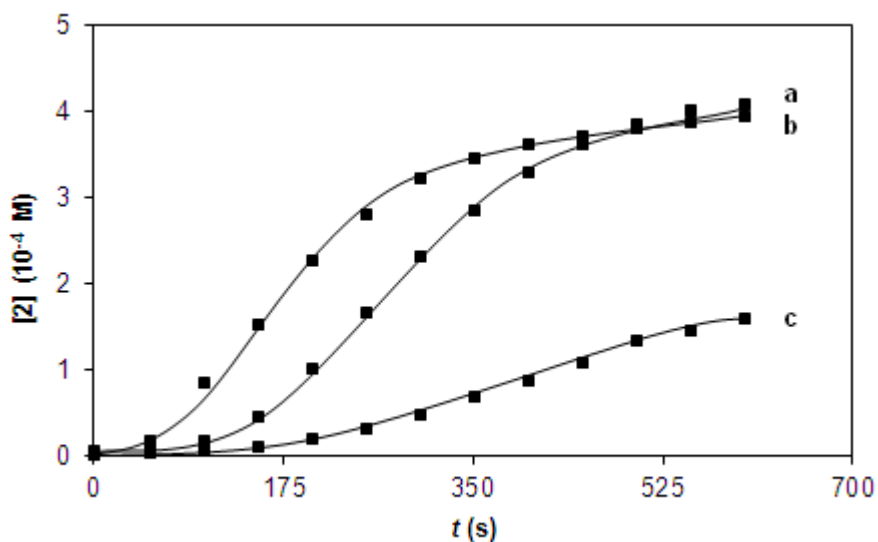

**Figure S16.**  $\text{Fe}^{\text{IV}}=\text{O}$  formation (at 693 nm) versus time in the reaction of **1** with benzaldehyde in MeCN at 25 °C.  $[\text{benzaldehyde}]_0 = 8.00 \times 10^{-2} \text{ M}$ ,  $[\mathbf{1}]_0 = 4.00 \times 10^{-3} \text{ M}$  (a);  $2.00 \times 10^{-3} \text{ M}$  (b);  $5.00 \times 10^{-4} \text{ M}$  (c).

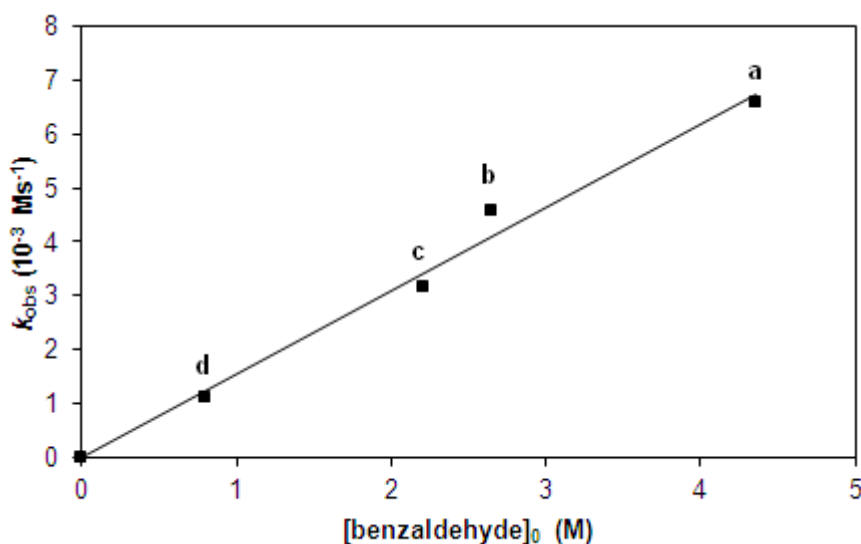

**Fig. S17.** Observed reaction rates versus benzaldehyde concentration in the reaction of **1** with benzaldehyde in MeCN at 25 °C.  $[\mathbf{1}]_0 = 2.00 \times 10^{-3} \text{ M}$ ,  $[\text{benzaldehyde}]_0 = 1.20 \times 10^{-1} \text{ M}$  (a);  $8.00 \times 10^{-2} \text{ M}$  (b);  $6.00 \times 10^{-2} \text{ M}$  (c);  $2.00 \times 10^{-2} \text{ M}$  (d).

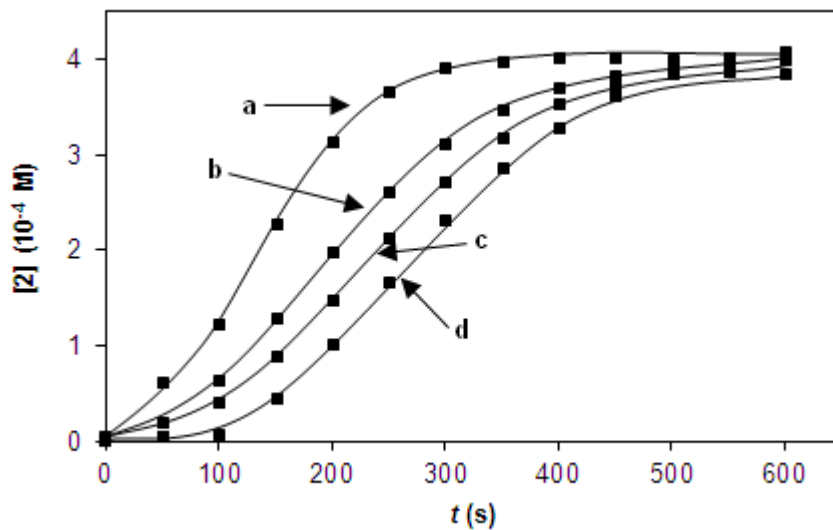

**Figure S18.**  $\text{Fe}^{\text{IV}}=\text{O}$  formation (at 693 nm) versus time in the reaction of **1** with benzaldehyde in MeCN at 25 °C.  $[\mathbf{1}]_0 = 2.00 \times 10^{-3} \text{ M}$ ,  $[\text{benzaldehyde}]_0 = 1.20 \times 10^{-1} \text{ M}$  (a);  $8.00 \times 10^{-2} \text{ M}$  (b);  $6.00 \times 10^{-2} \text{ M}$  (c);  $2.00 \times 10^{-2} \text{ M}$  (d).

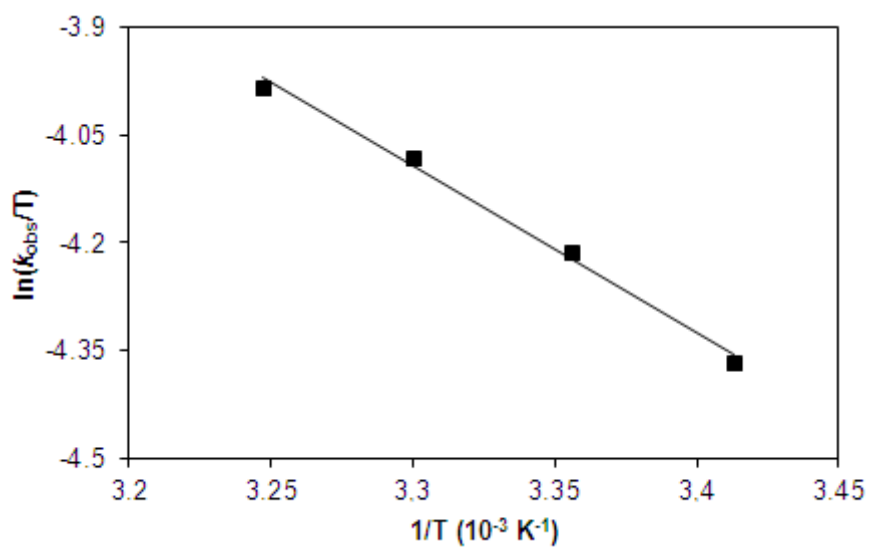

**Fig. S19.** Eyring plot of of **1** and benzaldehyde in MeCN under  $\text{O}_2$ .  $[\mathbf{1}]_0 = 2.00 \times 10^{-3} \text{ M}$ ,  $[\text{benzaldehyde}]_0 = 1.20 \times 10^{-1} \text{ M}$ .

**Table S3.** The  $k_{\text{obs}}$ ,  $k_3$  and  $\nu$  values for the reaction of **1** with different benzaldehyde derivatives in MeCN in cuvette under air.

| N <sub>0</sub> | T (K) | aldehyde             | [Fe] <sub>0</sub> (10 <sup>-3</sup> M) | [aldehyde] <sub>0</sub> (10 <sup>-2</sup> M) | $k_{\text{obs}}$ (10 <sup>-3</sup> s <sup>-1</sup> ) | $k_3$ (M <sup>-2</sup> s <sup>-1</sup> ) | $\nu$ (10 <sup>-6</sup> Ms <sup>-1</sup> ) |
|----------------|-------|----------------------|----------------------------------------|----------------------------------------------|------------------------------------------------------|------------------------------------------|--------------------------------------------|
| 1              | 298   | benzaldehyde         | 0.5                                    | 8                                            | 4.21                                                 | 32.48                                    | 2.11                                       |
| 2              | 298   | benzaldehyde         | 1                                      | 8                                            | 4.39                                                 | 33.87                                    | 4.39                                       |
| 3              | 298   | benzaldehyde         | 2                                      | 8                                            | 4.56                                                 | 35.18                                    | 9.12                                       |
| 4              | 298   | benzaldehyde         | 4                                      | 8                                            | 4.57                                                 | 35.26                                    | 18.28                                      |
| 5              | 293   | benzaldehyde         | 2                                      | 8                                            | 3.14                                                 | 24.23                                    | 6.28                                       |
| 6              | 303   | benzaldehyde         | 2                                      | 8                                            | 6.28                                                 | 48.46                                    | 12.56                                      |
| 7              | 308   | benzaldehyde         | 2                                      | 8                                            | 7.99                                                 | 61.65                                    | 15.98                                      |
| 8*             | 298   | benzaldehyde         | 1                                      | 8                                            | 19.1                                                 | 29.48                                    | 19.10                                      |
| 9              | 298   | benzaldehyde         | 2                                      | 2                                            | 1.12                                                 | 34.57                                    | 2.24                                       |
| 10             | 298   | benzaldehyde         | 2                                      | 6                                            | 3.15                                                 | 32.41                                    | 6.30                                       |
| 11             | 298   | benzaldehyde         | 2                                      | 12                                           | 6.58                                                 | 33.85                                    | 13.16                                      |
| 12             | 298   | isobutyraldehyde     | 2                                      | 4                                            | 0.97                                                 | 14.96                                    | 1.94                                       |
| 13             | 298   | 4-methylbenzaldehyde | 2                                      | 4                                            | 5.23                                                 | 80.71                                    | 10.46                                      |
| 14             | 298   | 4-chlorobenzaldehyde | 2                                      | 4                                            | 0.55                                                 | 8.49                                     | 1.10                                       |
| 15             | 298   | 4-cyanobenzaldehyde  | 2                                      | 4                                            | 0.05                                                 | 0.69                                     | 0.093                                      |

\*under O<sub>2</sub> atmosphere

### III. $\text{Fe}^{\text{IV}}=\text{O}$ mediated Baeyer-Villiger oxidation of cyclohexanones

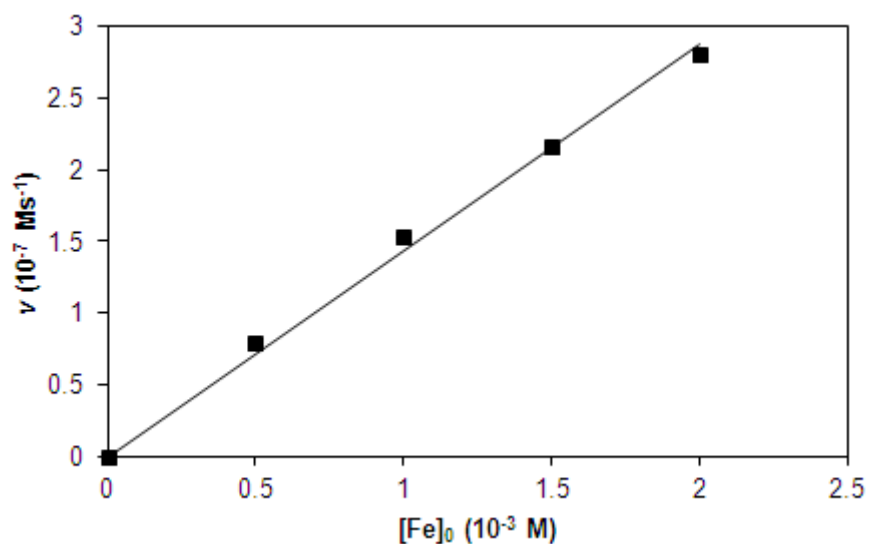

**Fig. S20.** Dependence on the reaction rate values on the iron concentrations for the decay of **2**, in the presence of cyclohexanone MeCN at 25 °C:  $[\text{PhIO}]_0 = 4.00 \times 10^{-3} \text{ M}$ ,  $[\text{cyclohexanone}]_0 = 1.00 \times 10^{-1} \text{ M}$ .

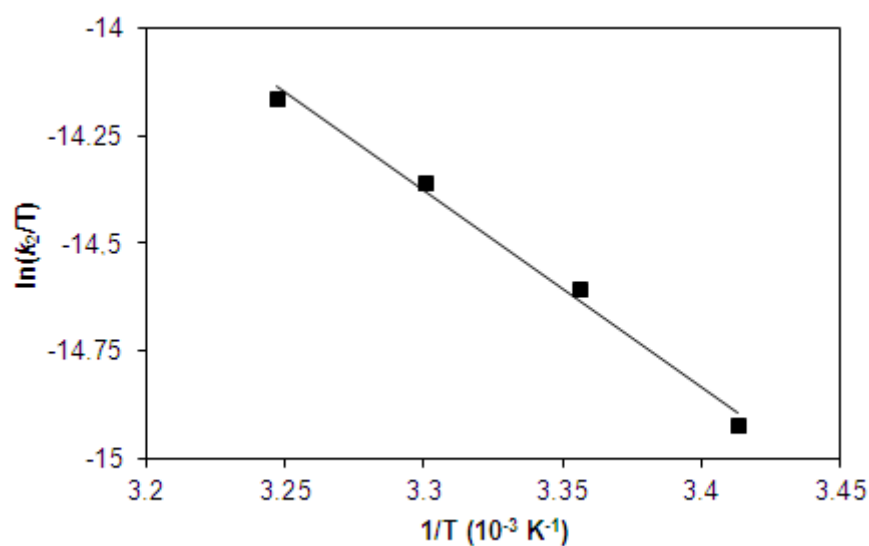

**Fig. S21.** Eyring plot of the reaction of **1** and cyclohexanone in MeCN.  $[\mathbf{1}]_0 = 2.00 \times 10^{-3} \text{ M}$ ,  $[\text{PhIO}]_0 = 4.00 \times 10^{-3} \text{ M}$ ,  $[\text{cyclohexanone}]_0 = 1.00 \times 10^{-1} \text{ M}$ .

**Table S4.** The  $k_{\text{obs}}$  and  $k_2$  values for the reaction of **1** with cyclohexanone derivatives in MeCN in cuvette under air.

| N <sub>0</sub> | T (K) | substrate                           | [Fe] <sub>0</sub> (10 <sup>-3</sup> M) | [S] <sub>0</sub> (M) | $k_{\text{obs}}$ (10 <sup>-4</sup> s <sup>-1</sup> ) | $k_2$ (10 <sup>-3</sup> M <sup>-1</sup> s <sup>-1</sup> ) | $\nu$ (10 <sup>-7</sup> Ms <sup>-1</sup> ) |
|----------------|-------|-------------------------------------|----------------------------------------|----------------------|------------------------------------------------------|-----------------------------------------------------------|--------------------------------------------|
| 1              | 298   | cyclohexanone                       | 0.5                                    | 0.1                  | 1.59                                                 | 1.59                                                      | 0.80                                       |
| 2              | 298   | cyclohexanone                       | 1                                      | 0.1                  | 1.53                                                 | 1.53                                                      | 1.53                                       |
| 3              | 298   | cyclohexanone                       | 1.5                                    | 0.1                  | 1.44                                                 | 1.44                                                      | 2.16                                       |
| 4              | 298   | cyclohexanone                       | 2                                      | 0.1                  | 1.35                                                 | 1.35                                                      | 2.70                                       |
| 5              | 293   | cyclohexanone                       | 2                                      | 0.1                  | 0.97                                                 | 0.97                                                      | 1.94                                       |
| 6              | 303   | cyclohexanone                       | 2                                      | 0.10                 | 1.76                                                 | 1.76                                                      | 3.52                                       |
| 7              | 308   | cyclohexanone                       | 2                                      | 0.10                 | 2.18                                                 | 2.18                                                      | 4.36                                       |
| 8              | 298   | cyclohexanone                       | 2                                      | 0.15                 | 2.41                                                 | 1.60                                                      | 4.82                                       |
| 9              | 298   | cyclohexanone                       | 2                                      | 0.20                 | 3.02                                                 | 1.51                                                      | 6.03                                       |
| 10             | 298   | cyclohexanone                       | 2                                      | 0.25                 | 3.82                                                 | 1.53                                                      | 7.64                                       |
| 11             | 298   | 2-methyl-cyclohexanone              | 2                                      | 0.10                 | 1.03                                                 | 1.03                                                      | 2.06                                       |
| 12             | 298   | 2-methyl-cyclohexanone              | 2                                      | 0.15                 | 1.66                                                 | 1.10                                                      | 3.32                                       |
| 13             | 298   | 2-methyl-cyclohexanone              | 2                                      | 0.20                 | 1.99                                                 | 1.00                                                      | 3.98                                       |
| 14             | 298   | 2-methyl-cyclohexanone              | 2                                      | 0.25                 | 2.61                                                 | 1.04                                                      | 5.22                                       |
| 15             | 298   | 3-methyl-cyclohexanone              | 2                                      | 0.10                 | 0.28                                                 | 0.28                                                      | 0.56                                       |
| 16             | 298   | 3-methyl-cyclohexanone              | 2                                      | 0.15                 | 0.37                                                 | 0.25                                                      | 0.74                                       |
| 17             | 298   | 3-methyl-cyclohexanone              | 2                                      | 0.20                 | 0.49                                                 | 0.25                                                      | 0.98                                       |
| 18             | 298   | 3-methyl-cyclohexanone              | 2                                      | 0.25                 | 0.63                                                 | 0.25                                                      | 1.25                                       |
| 15             | 298   | 4-methyl-cyclohexanone              | 2                                      | 0.10                 | 0.86                                                 | 0.86                                                      | 1.71                                       |
| 16             | 298   | 4-methyl-cyclohexanone              | 2                                      | 0.15                 | 1.28                                                 | 0.86                                                      | 2.56                                       |
| 17             | 298   | 4-methyl-cyclohexanone              | 2                                      | 0.20                 | 1.81                                                 | 0.91                                                      | 3.62                                       |
| 18             | 298   | 4-methyl-cyclohexanone              | 2                                      | 0.25                 | 2.23                                                 | 0.89                                                      | 4.46                                       |
| 19             | 298   | 4- <i>tert</i> -butyl-cyclohexanone | 2                                      | 0.10                 | 0.40                                                 | 0.40                                                      | 0.80                                       |
| 20             | 298   | 4- <i>tert</i> -butyl-cyclohexanone | 2                                      | 0.15                 | 0.73                                                 | 0.48                                                      | 1.46                                       |
| 21             | 298   | 4- <i>tert</i> -butyl-cyclohexanone | 2                                      | 0.20                 | 0.89                                                 | 0.45                                                      | 1.78                                       |
| 22             | 298   | 4- <i>tert</i> -butyl-cyclohexanone | 2                                      | 0.25                 | 1.17                                                 | 0.47                                                      | 2.34                                       |
